# Supplementary material for: Molecular motor tug-of-war regulates elongasome cell wall synthesis dynamics in Bacillus subtilis
Source: PubMed Central journal article supplement (PMC11208587; doi:10.1038/s41467-024-49785-x), 2024-06-26
Supplement: 41467_2024_49785_MOESM3_ESM.pdf [file 41467_2024_49785_MOESM3_ESM.pdf]

## Description of Additional Supplementary Files:

**Supplementary Movie 1:** Example of MreB singlemolecule dynamics in wild-type live *B. subtilis* cells imaged via smVerCINI corresponding to leftmost kymograph, Fig 1b. Scale bar, 1  $\mu\text{m}$ .

**Supplementary Movie 2:** Example of MreB singlemolecule dynamics in wild-type live *B. subtilis* cells imaged via smVerCINI corresponding to rightmost kymograph, Fig 1b. Scale bar, 1  $\mu\text{m}$ .

**Supplementary Movie 3:** Example of MreB singlemolecule dynamics in wild-type live *B. subtilis* cells imaged via smVerCINI. Scale bar, 1  $\mu\text{m}$ .

**Supplementary Movie 4:** Example of MreB singlemolecule dynamics in low RodA expression level corresponding to Fig 2a. Scale bar, 1  $\mu\text{m}$ .

**Supplementary Movie 5:** Example of MreB singlemolecule dynamics in low RodA expression level corresponding to Supplementary Figure 13, top, leftmost kymograph. Scale bar, 1  $\mu\text{m}$ .

**Supplementary Movie 6:** Example of MreB singlemolecule dynamics in low RodA expression level corresponding to Supplementary Figure 13a, kymograph 2nd from left. Scale bar, 1  $\mu\text{m}$ .

**Supplementary Movie 7:** Example of MreB singlemolecule dynamics in low RodA expression level corresponding to Supplementary Figure 1, top, kymograph 3rd from left. Scale bar, 1  $\mu\text{m}$ .

**Supplementary Movie 8:** Example of MreB singlemolecule dynamics in low RodA expression level corresponding to Supplementary Figure 13, top, rightmost kymograph. Scale bar, 1  $\mu\text{m}$ .

**Supplementary Movie 9:** Example of MreB singlemolecule dynamics in high RodA expression level corresponding to kymograph Fig 2b. Scale bar, 1  $\mu\text{m}$ .

**Supplementary Movie 10:** Example of MreB singlemolecule dynamics in high RodA expression level corresponding to Supplementary Figure 13, bottom, leftmost kymograph. Scale bar, 1  $\mu\text{m}$ .

**Supplementary Movie 11:** Example of MreB singlemolecule dynamics in high RodA expression level corresponding to Supplementary Figure 13, bottom, kymograph 2nd from left. Scale bar, 1  $\mu\text{m}$ .

**Supplementary Movie 12:** Example of MreB singlemolecule dynamics in high RodA expression level corresponding to Supplementary Figure 13, bottom, kymograph 3rd from left. Scale bar, 1  $\mu\text{m}$ .

**Supplementary Movie 13:** Example of MreB singlemolecule dynamics in high RodA expression level corresponding to Supplementary Figure 13, bottom, rightmost kymograph. Scale bar, 1  $\mu\text{m}$ .
